# Supplementary material for: Combining location-and-scale batch effect adjustment with data cleaning by latent factor adjustment
Source: PubMed Central journal article supplement (PMC4710051; doi:10.1186/s12859-015-0870-z), 2016-01-12
Supplement: 12859_2015_870_MOESM1_ESM.pdf [file 12859_2015_870_MOESM1_ESM.pdf]

Supporting information for the BMC Bioinformatics article:

**Combining location-and-scale batch effect  
adjustment with data cleaning by latent factor  
adjustment**

Roman Hornung\*, Anne-Laure Boulesteix, David Causeur

---

\*Corresponding author: e-mail: [hornung@ibe.med.uni-muenchen.de](mailto:hornung@ibe.med.uni-muenchen.de), Phone: +4989-440077754, Fax: +4989-440077491, Department of Medical Informatics, Biometry and Epidemiology, University of Munich, Marchioninstr. 15, D-81377, Munich, Germany

## A Description of existing batch effect adjustment methods

### A.1 ComBat

This method assumes the following model for the observed data  $x_{ijg}$ :

$$x_{ijg} = \alpha_g + \mathbf{a}_{ij}^T \boldsymbol{\beta}_g + \gamma_{jg} + \delta_{jg} \epsilon_{ijg}, \quad \epsilon_{ijg} \sim N(0, \sigma_g^2).$$

Here all involved parameters are as in the Section “Methods” of the main paper. Note that the restriction to binary target variables, which is not necessary in general for the application of ComBat, is required for the application of our method.

The unobserved counterpart  $x_{ijg}^*$  of  $x_{ijg}$  not affected by batch effects is assumed to be

$$x_{ijg}^* = \alpha_g + \mathbf{a}_{ij}^T \boldsymbol{\beta}_g + \epsilon_{ijg}, \quad \epsilon_{ijg} \sim N(0, \sigma_g^2).$$

The goal of batch effect correction via ComBat is to estimate these unobserved  $x_{ijg}^*$ -values. The following transformation of the observed  $x_{ijg}$ -values would provide the true  $x_{ijg}^*$ -values:

$$\begin{aligned} & \sqrt{\text{Var}(x_{ijg}^*)} \left( \frac{x_{ijg} - \text{E}(x_{ijg})}{\sqrt{\text{Var}(x_{ijg})}} \right) + \text{E}(x_{ijg}^*) \\ &= \sigma_g \left( \frac{x_{ijg} - (\alpha_g + \mathbf{a}_{ij}^T \boldsymbol{\beta}_g + \gamma_{jg})}{\delta_{jg} \sigma_g} \right) + \alpha_g + \mathbf{a}_{ij}^T \boldsymbol{\beta}_g \\ &= \alpha_g + \mathbf{a}_{ij}^T \boldsymbol{\beta}_g + \epsilon_{ijg} = x_{ijg}^*. \end{aligned} \tag{1}$$

In practice, however, the parameters involved in Eq. (1) are not known and have to be estimated. In particular,  $\gamma_{jg}/\sigma_g$  and  $\delta_{jg}$  are estimated using empirical Bayes to obtain more robust results. See [1] for details on the estimation procedure. Note that in the analyses performed in the main paper we do not include the term  $\mathbf{a}_{ij}^T \boldsymbol{\beta}_g$  in the adjustment. The first reason for this is that in the Section “Application in cross-batch prediction” of the main paper we study cross-batch prediction. Here the class values  $\mathbf{a}_{ij}$  are not known in the test data. The second reason is that using the class values  $\mathbf{a}_{ij}$  together with the estimates of  $\boldsymbol{\beta}_g$  may lead to an artificially increased class signal, because the estimates of  $\boldsymbol{\beta}_g$  depend on the class values  $\mathbf{a}_{ij}$ . This kind of mechanism is discussed in detail, but in slightly other contexts, in the Sections “Using estimated probabilities instead of actual classes” and “Artificial increase of measured class signal by applying SVA” of the main paper.

### A.2 SVA

The model for the observed data is given by:

$$\begin{aligned} x_{ijg} &= \alpha_g + \mathbf{a}_{ij}^T \boldsymbol{\beta}_g + \sum_{l=1}^m b_{gl} Z_{ijl} + \epsilon_{ijg}, \\ \text{Var}(\epsilon_{ijg}) &= \sigma_g^2. \end{aligned} \tag{2}$$

Here  $\alpha_g$  and  $\mathbf{a}_{ij}^T \boldsymbol{\beta}_g$  are as in the previous subsection and  $Z_{ij1}, \dots, Z_{ijm}$  are random latent factors with loadings  $b_{g1}, \dots, b_{gm}$ .

The unobserved, batch-free data is correspondingly:

$$x_{ijg}^* = \alpha_g + \mathbf{a}_{ij}^T \boldsymbol{\beta}_g + \epsilon_{ijg}, \quad \text{Var}(\epsilon_{ijg}) = \sigma_g^2. \quad (3)$$

Note again that in the SVA-model the batch membership is assumed to be unknown. For judging the appropriateness of the SVA algorithm it is important to specify the model underlying SVA as precisely as possible. Out of the following two facts it can be followed that the distribution of the latent factors can be different for each observation—in the extreme case. Firstly, the assumed form of the batch-free data in Eq. (3) implies that the distortions between the batches are induced fully by the latent factors. Secondly, each observation may come from a different batch with own mean-, covariance- and correlation-structure.

The SVA batch effect adjustment is performed by subtracting  $\sum_{l=1}^m b_{gl} Z_{ijl}$  from  $x_{ijg}$ :

$$x_{ijg} - \sum_{l=1}^m b_{gl} Z_{ijl} = \alpha_g + \mathbf{a}_{ij}^T \boldsymbol{\beta}_g + \epsilon_{ijg} = x_{ijg}^*.$$

The latent factors are estimated as the first  $m$  right singular vectors from a singular value decomposition (SVD). In the Section “Background” of the main paper we stressed that inhomogeneities in datasets are not only due to batch effects, but also due to the biological signal of interest, i.e. the term  $\mathbf{a}_{ij}^T \boldsymbol{\beta}_g$  in Eq. (2) and (3). Therefore, we noted that the biological signal of interest has to be protected during factor estimation in FAbatch. In SVA, to protect the biological signal, before performing the SVD on the transposed covariate matrix, the variable values are weighted by the estimated probabilities that the corresponding variables are associated with unmeasured confounders, but not with the binary variable representing the biological signal. The factor loadings are estimated by linear models. The “frozen SVA” procedure [2] is an extension of SVA [3], which we will detail in the following subsection.

### A.2.1 frozen SVA (fSVA)

In addition to describing the two algorithms gathered under the designation “frozen SVA”, in this subsection we demonstrate that the “fast fSVA algorithm” is the addon procedure for SVA in the vein of the Section “Addon adjustment of independent batches” of the main paper.

The  $b_{gl}$ - and the  $\boldsymbol{\beta}_g$ -values are two of the batch-unspecific parameters involved in the SVA adjustment. The  $\boldsymbol{\beta}_g$ -values are implicitly involved, namely when multiplying the variable values by the estimated probabilities that the corresponding variable is associated with unmeasured confounders, but not with the binary variable representing the biological signal. In both frozen SVA algorithms, when adjusting for batch effects in new observations the estimates of the  $b_{gl}$ -values obtained on the training data are used. Also, for multiplying the variable values of a new observation by the estimated probabilities that the corresponding variable is associated with unmeasured confounders but not with the target variable, both algorithms use the estimates obtained on the training data. The distinguishing feature between the two algorithms is the way estimates of the factors  $Z_{ijl}$  for new observations are obtained.

In the first frozen SVA algorithm, denoted as “exact fSVA algorithm” in [2], the latent factor vector for a new observation is estimated in the following way: 1) Combine the training data with the values of the new observation and multiply by the probabilities estimated on the training data; 2) Re-perform the SVD on the combined data from 1) and use the right singular vector corresponding to the new observation as the estimate of its vector of latent factors. This algorithm is, however, not an addon procedure. In this algorithm, the estimate of the latent factor vector for the test observation originates from a different SVD than the estimated latent factors of the training observations. Therefore, this new estimated latent factor behaves—at least to some extent—differently than that of the training data. As a consequence, when adjusting the new observation a feature of addon procedures is not given: the same kind of transformation must be performed for independent batches. This problem can be assumed to have a lower impact for larger training datasets. Here the latent factor model estimated on the training data depends less on whether a single new observation is included into the SVD or not. A solution to the problem of differently behaving latent factor estimates in training and test data would be the following: for adjusting the training data use the estimates of the latent factors (and their loadings) obtained in the second SVD performed after including the test observation. This would, however, again not correspond to an addon procedure, because then the adjusted training data would be changed each time a new observation is included, which is not allowed as stated in our definition of addon procedures given in the Section “Addon adjustment of independent batches” of the main paper.

The second frozen SVA algorithm, denoted as “fast fSVA algorithm” in [2] takes a different approach. Here, the SVD is not re-performed entirely on the combination of the training data and the new observation. Instead, one essentially performs a SVD for calculating the right singular vector corresponding to the new observation, in which the left singular vectors and singular values are fixed to the values of these parameters obtained in the SVA, which had been performed on the training data. Thus in this adjustment, it is taken into account that the left singular vectors and singular values are batch-unspecific parameters. The resulting estimated latent factor vector of the new observation behaves in the same way as that of the training data, because here it originates from the same SVD. This algorithm does correspond to an addon procedure, because the same kind of transformation is performed for independent batches, i.e. observations in the SVA model, without the need to change the training data.

### A.3 Further batch effect adjustment methods considered in the comparison studies

#### A.3.1 Mean-centering

From each measurement the mean of the values of the corresponding variable in the corresponding batch is subtracted:

$$\widehat{x}_{ijg}^* = x_{ijg} - \widehat{\mu}_{jg}, \quad (4)$$

where  $\widehat{\mu}_{jg} = (1/n_j) \sum_j x_{ijg}$ .

### A.3.2 Standardization

The values of each variable are centered and scaled per batch:

$$\widehat{x}_{ijg}^* = \frac{x_{ijg} - \widehat{\mu}_{jg}}{\sqrt{\widehat{\sigma}_{jg}^2}},$$

where  $\widehat{\mu}_{jg}$  as in (4) and  $\widehat{\sigma}_{jg}^2 = [1/(n_j - 1)] \sum_i (x_{ijg} - \widehat{\mu}_{jg})^2$ .

### A.3.3 Ratio-A

Each measurement is divided by the arithmetic mean of the values of the variable in the corresponding batch [4]:

$$\widehat{x}_{ijg}^* = \frac{x_{ijg}}{\widehat{\mu}_{jg}},$$

where  $\widehat{\mu}_{jg}$  is that same as in (4).

### A.3.4 Ratio-G

Each measurement is divided by the geometric mean of the values of the variable in the corresponding batch [4]:

$$\widehat{x}_{ijg}^* = \frac{x_{ijg}}{\widehat{\mu}_{g,geom}},$$

where  $\widehat{\mu}_{g,geom} = \sqrt[n_j]{\prod_i x_{ijg}}$ .

## B Plots used in verification of model assumptions

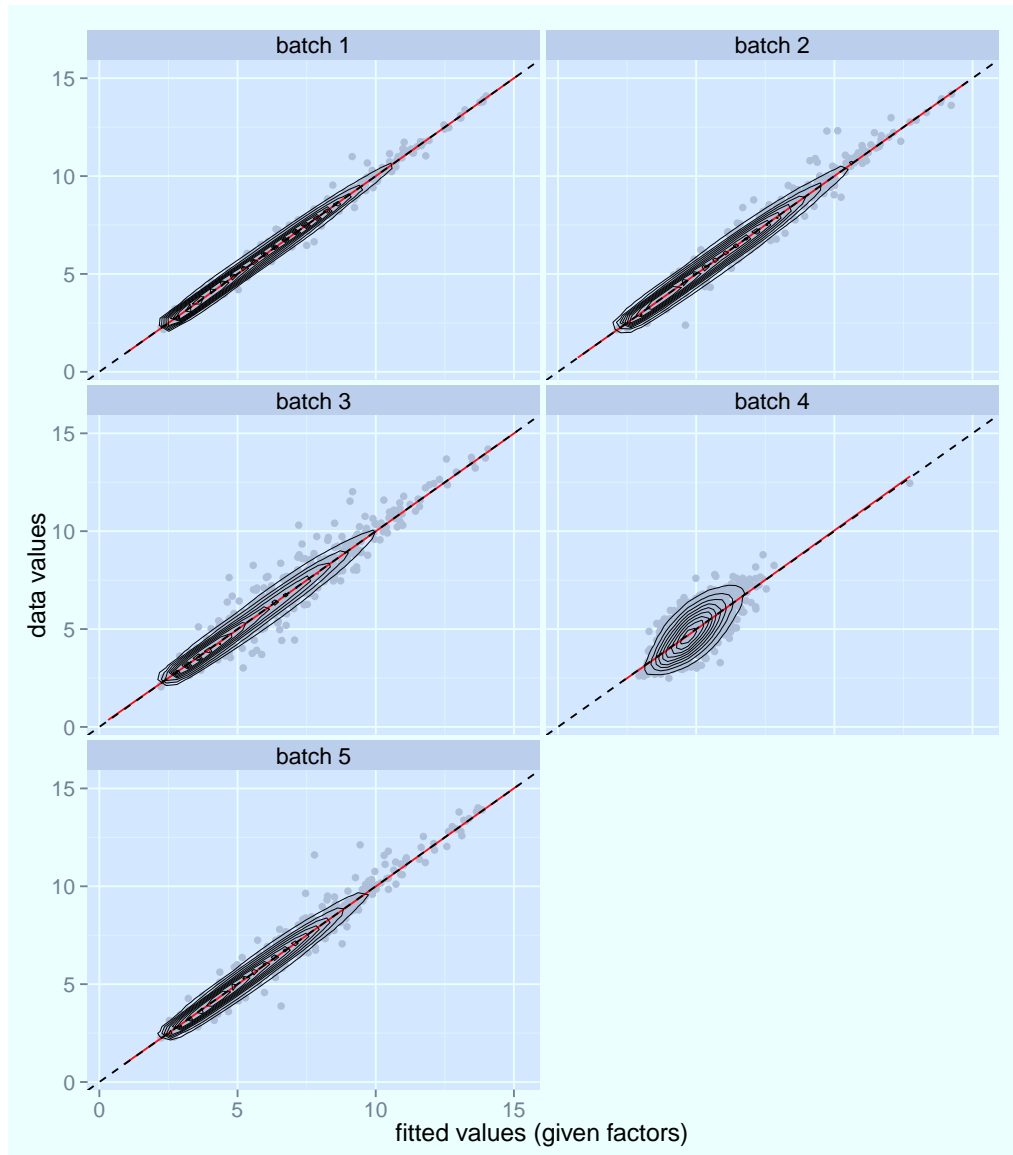

Fig. S1: Data values against fitted values resulting from FAbatch method. The contour lines represent two-dimensional kernel density estimates. The dashed line mark the bisectors and the red lines are LOESS estimates of the associations. The grey dots are in each case random subsets of size 1000 of all values.

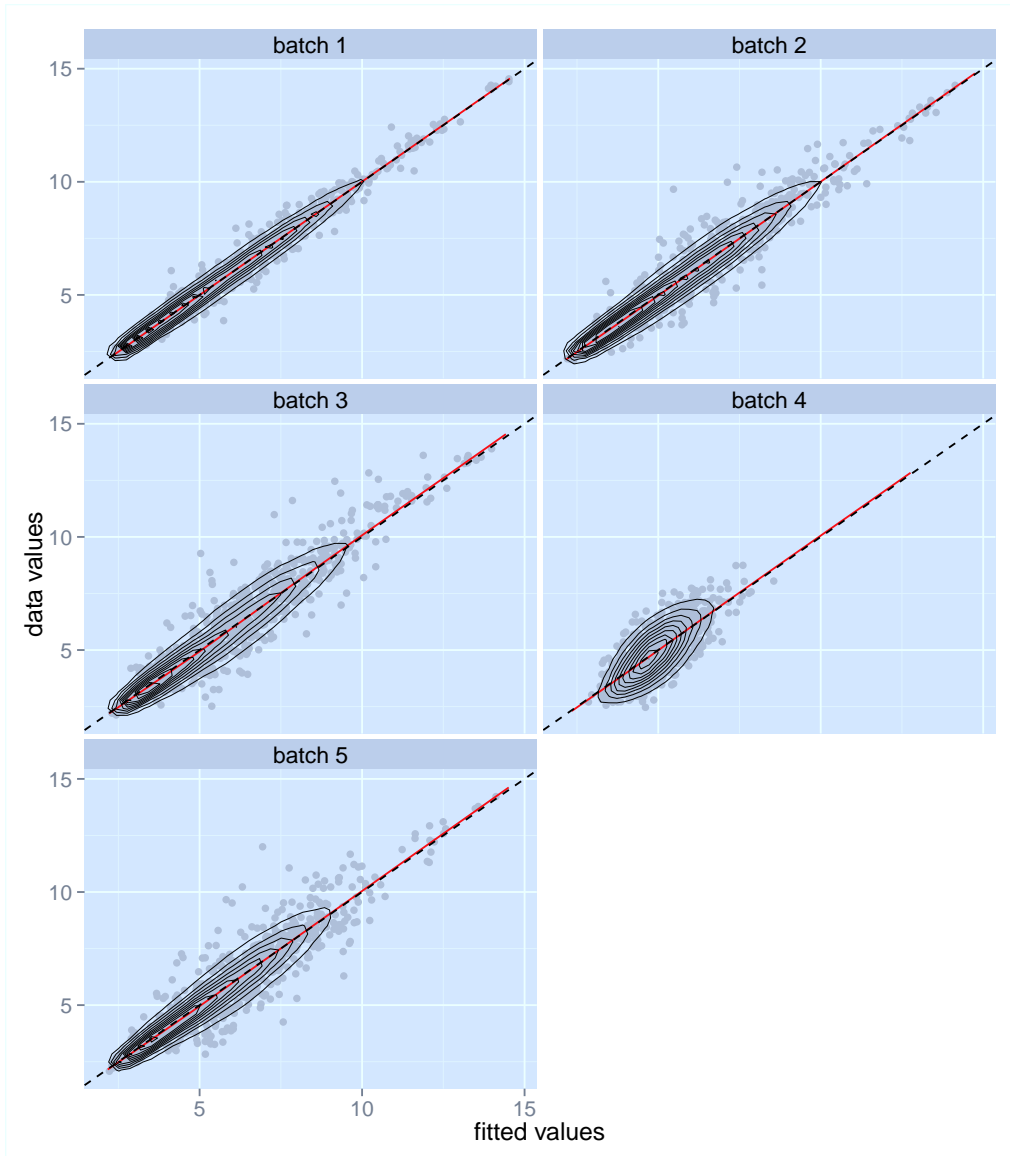

Fig. S2: Data values against fitted values resulting from ComBat method. The contour lines represent two-dimensional kernel density estimates. The dashed line mark the bisectors and the red lines are LOESS estimates of the associations. The grey dots are in each case random subsets of size 1000 of all values.

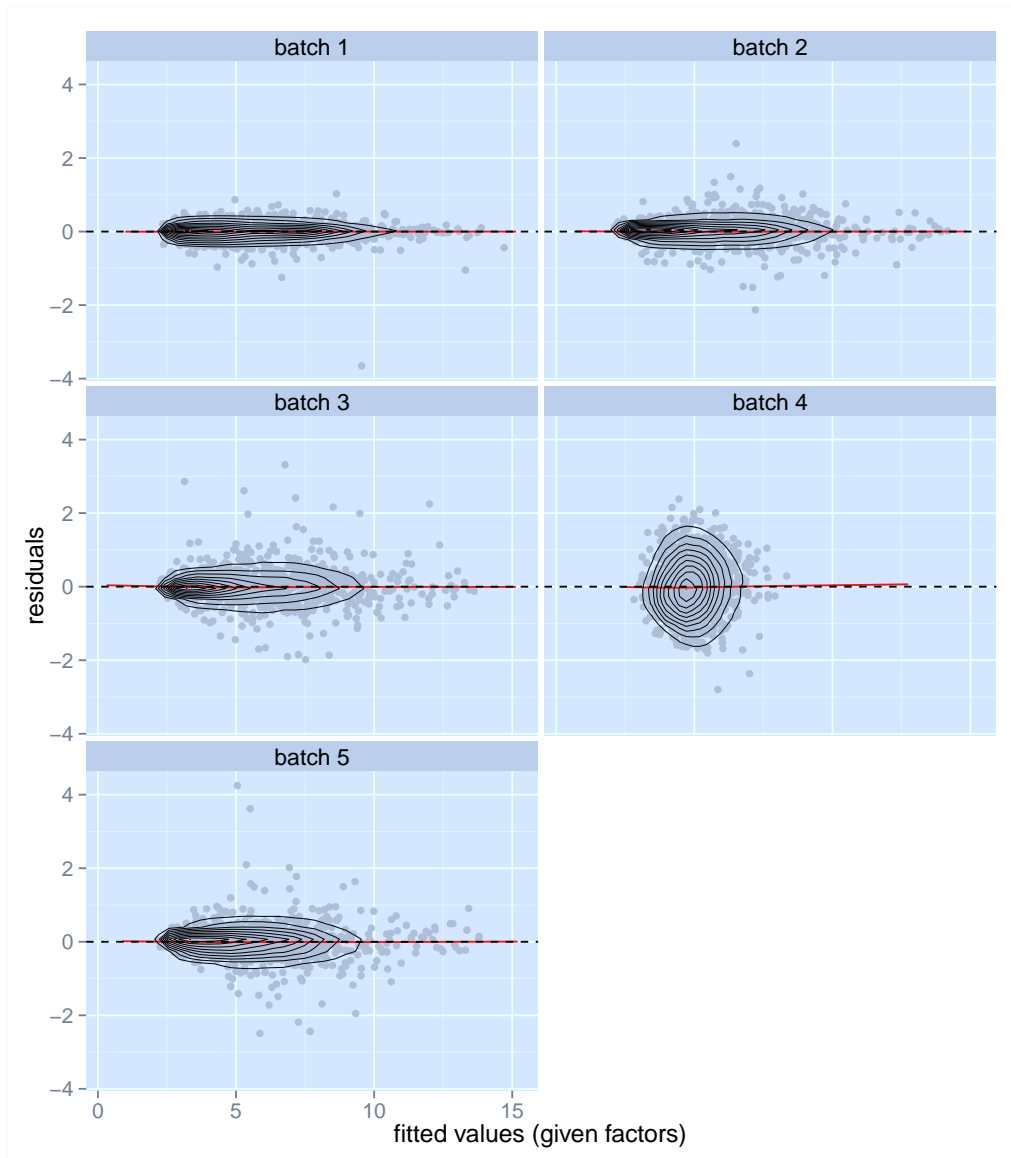

Fig. S3: Deviations from fitted values resulting from FAbatch method against corresponding fitted values. The contour lines represent two-dimensional kernel density estimates. The dashed lines mark the horizontal zero lines and the red lines are LOESS estimates of the associations. The grey dots are in each case random subsets of size 1000 of all values.



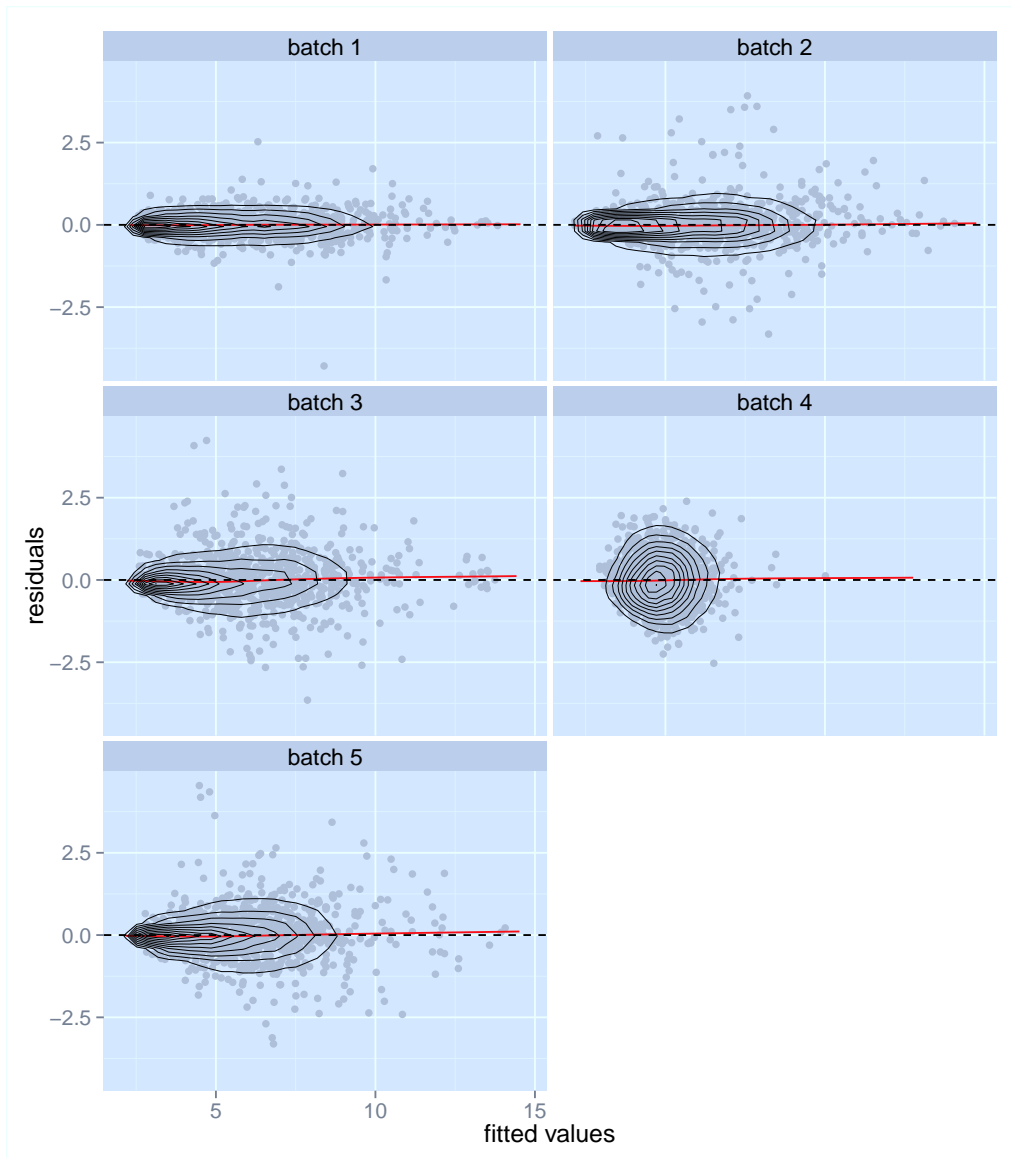

Fig. S4: Deviations from fitted values resulting from ComBat method against corresponding fitted values. The contour lines represent two-dimensional kernel density estimates. The dashed lines mark the horizontal lines and the red lines are LOESS estimates of the associations. The grey dots are in each case random subsets of size 1000 of all values.

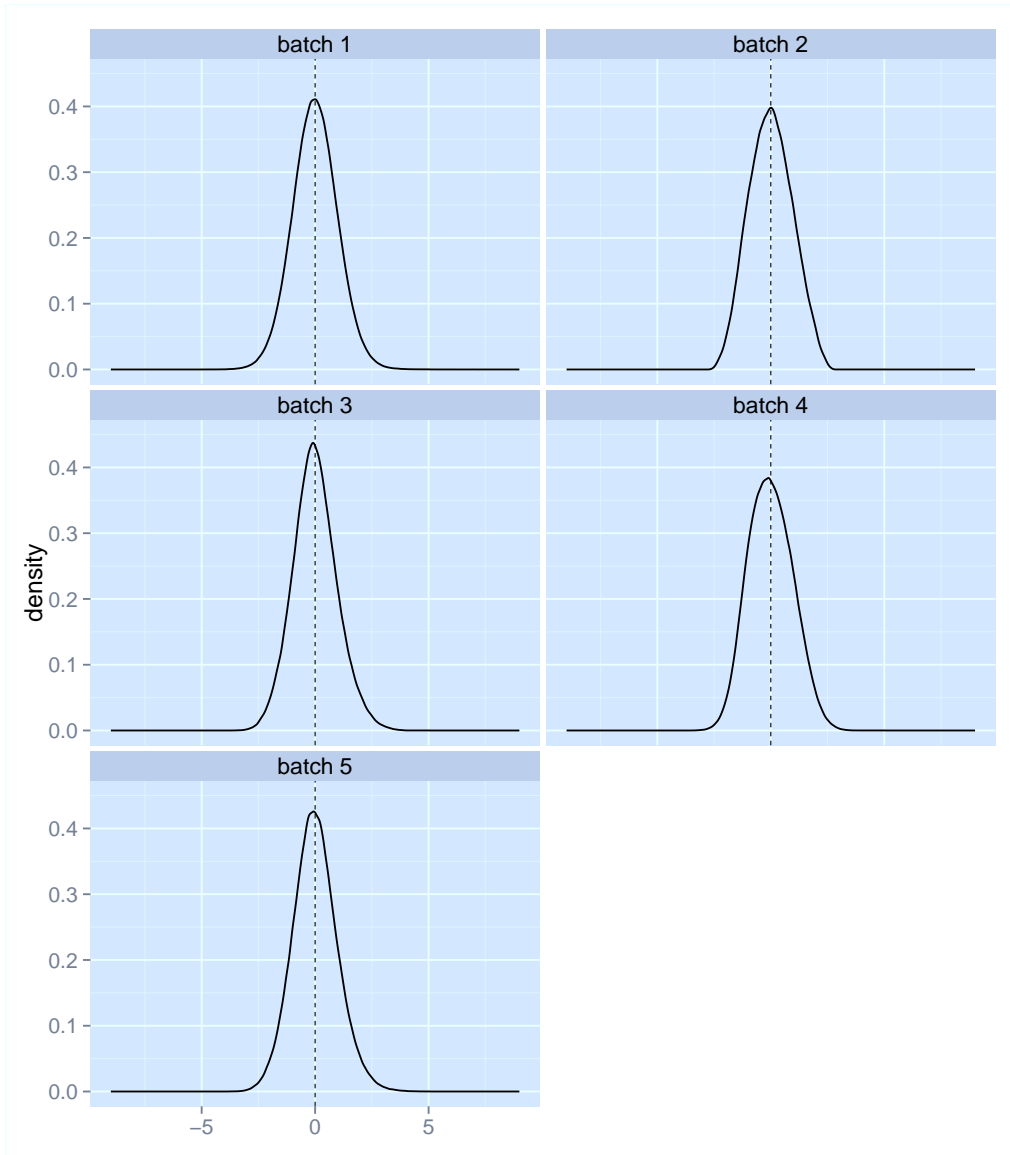

Fig. S5: Density estimates of the deviations from the fitted values divided by their standard deviations for the FAbatch method. The dashed lines mark the vertical zero lines.

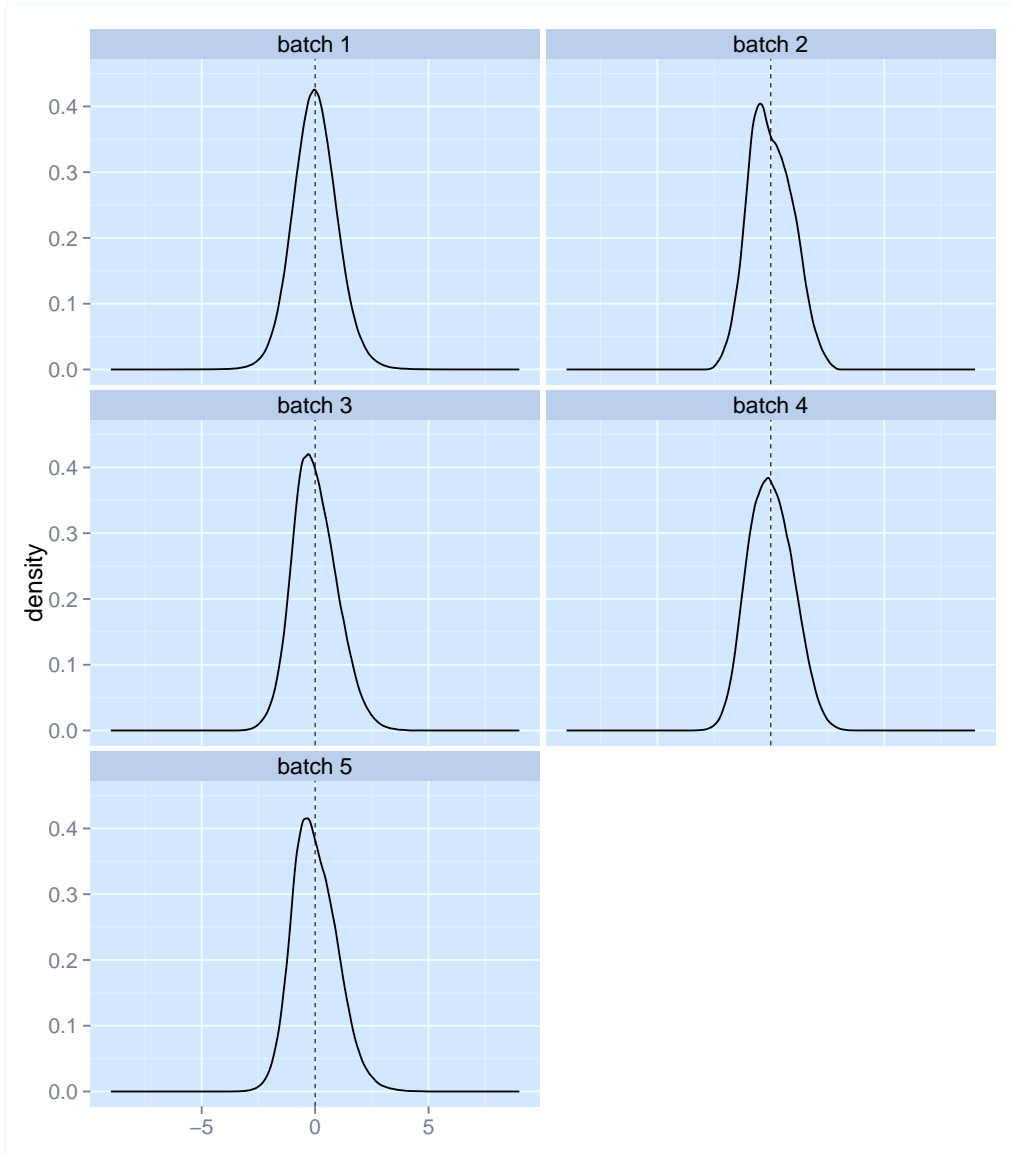

Fig. S6: Density estimates of the deviations from the fitted values divided by their standard deviations for the ComBat method. The dashed lines mark the vertical zero lines.

## C Visualizations of the batch effects in the used datasets: plots of the first two principal components out of Principal Component Analysis

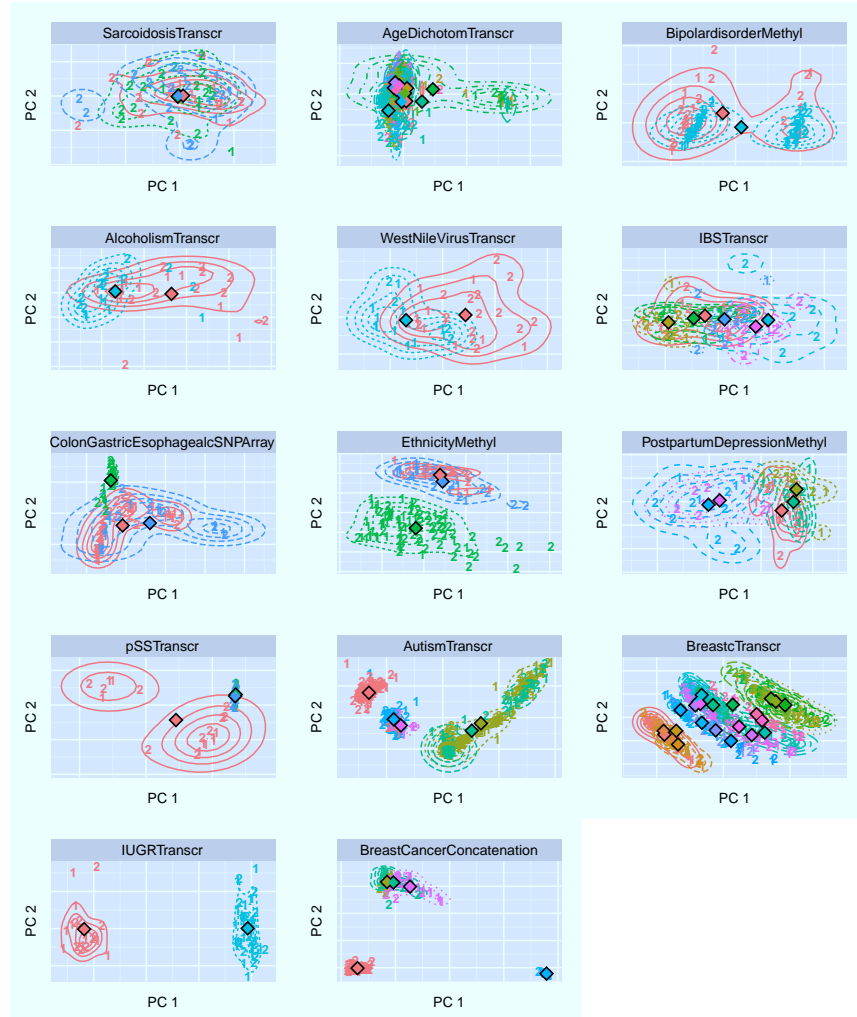

Fig. S7: Each subplot shows the first two principal components out of PCA performed on the covariate matrix of one of the datasets used. In each case the colors distinguish the batches, and the numbers distinguish the two classes “diseased” (2) vs. “healthy control” (1). The contour lines represent batch-wise two-dimensional kernel estimates and the diamonds represent the batch-wise centers of gravities of the points. The plots are arranged in ascending order according to the strength of batch effects with respect to the following criterion: Average over the euclidean distances between all possible pairs of points in the plot from different batches divided by the analogous mean over all such pairs from the same batches.

## D Target variables of datasets used in comparison study

**ColonGastricEsophagealcSNPArray:** “gastric cancer” ( $y = 2$ ) vs. “healthy” ( $y = 1$ )

**AgeDichotomTranscr:** “chronic alcoholic” ( $y = 2$ ) vs. “healthy” ( $y = 1$ )

**EthnicityMethyl:** “Caucasian, from Utah and of European ancestry” ( $y = 2$ ) vs. “Yorubian, from Ibadan Nigeria” ( $y = 1$ )

**BipolardisorderMethyl:** “bipolar disorder” ( $y = 2$ ) vs. “healthy” ( $y = 1$ )

**PostpartumDepressionMethyl:** “depression post partum” ( $y = 2$ ) vs. “healthy” ( $y = 1$ )

**AutismTranscr:** “autistic” ( $y = 2$ ) vs. “healthy” ( $y = 1$ )

**BreastcTranscr:** “breast cancer” ( $y = 2$ ) vs. “healthy” ( $y = 1$ )

**BreastCancerConcatenation:** “breast cancer” ( $y = 2$ ) vs. “healthy” ( $y = 1$ )

**IUGRTranscr:** “intrauterine growth restriction” ( $y = 2$ ) vs. “healthy” ( $y = 1$ )

**IBSTranscr:** “constipation-predominant/diarrhoea-predominant irritable bowel syndrome” ( $y = 2$ ) vs. “healthy” ( $y = 1$ )

**SarcoidosisTranscr:** “sarcoidosis” ( $y = 2$ ) vs. “healthy” ( $y = 1$ )

**pSSTranscr:** “Sjogren’s/sicca syndrome” ( $y = 2$ ) vs. “healthy” ( $y = 1$ )

**AlcoholismTranscr:** “alcoholic” ( $y = 2$ ) vs. “healthy” ( $y = 1$ )

**WestNileVirusTranscr:** “severe West Nile virus infection” ( $y = 2$ ) vs. “asymptomatic West Nile virus infection” ( $y = 1$ )

## E Reasons for batch effect structures of datasets used in comparison study

**EthnicityMethyl:** “To limit the potential bias due to experimental batches, samples were randomized by population identity and hybridized in three batches.” [5]

**BreastcTranscr:** “To minimize possible processing and chip lot effects, samples were assigned to processing batches of seven to nine pairs, and batches had similar distributions of age, race, and date of enrollment. For array hybridization, each batch was assigned to one of two different chip lots ('A' and 'B') in a manner designed to ensure a balance of these same characteristics. [...] Laboratory personnel were blind to case control status and other phenotype information.” [6]

**BreastCancerConcatenation:** Concatenation of five independent datasets.

**IUGRTranscr:** Citation from the description on the ArrayExpress-website: “[...] were collected during the years of 2004-2008 and hybridized in two batches to microarrays. Samples were randomized across arrays to control for array and batch variability.”

**AlcoholismTranscr:** The batch variable in the sdrf.txt-file is designated as “labeling batch”, from which we deduced that the batch structure is due to labeling for this dataset.

**F** Boxplots of the metric values for simulated datasets per method and simulation scenario

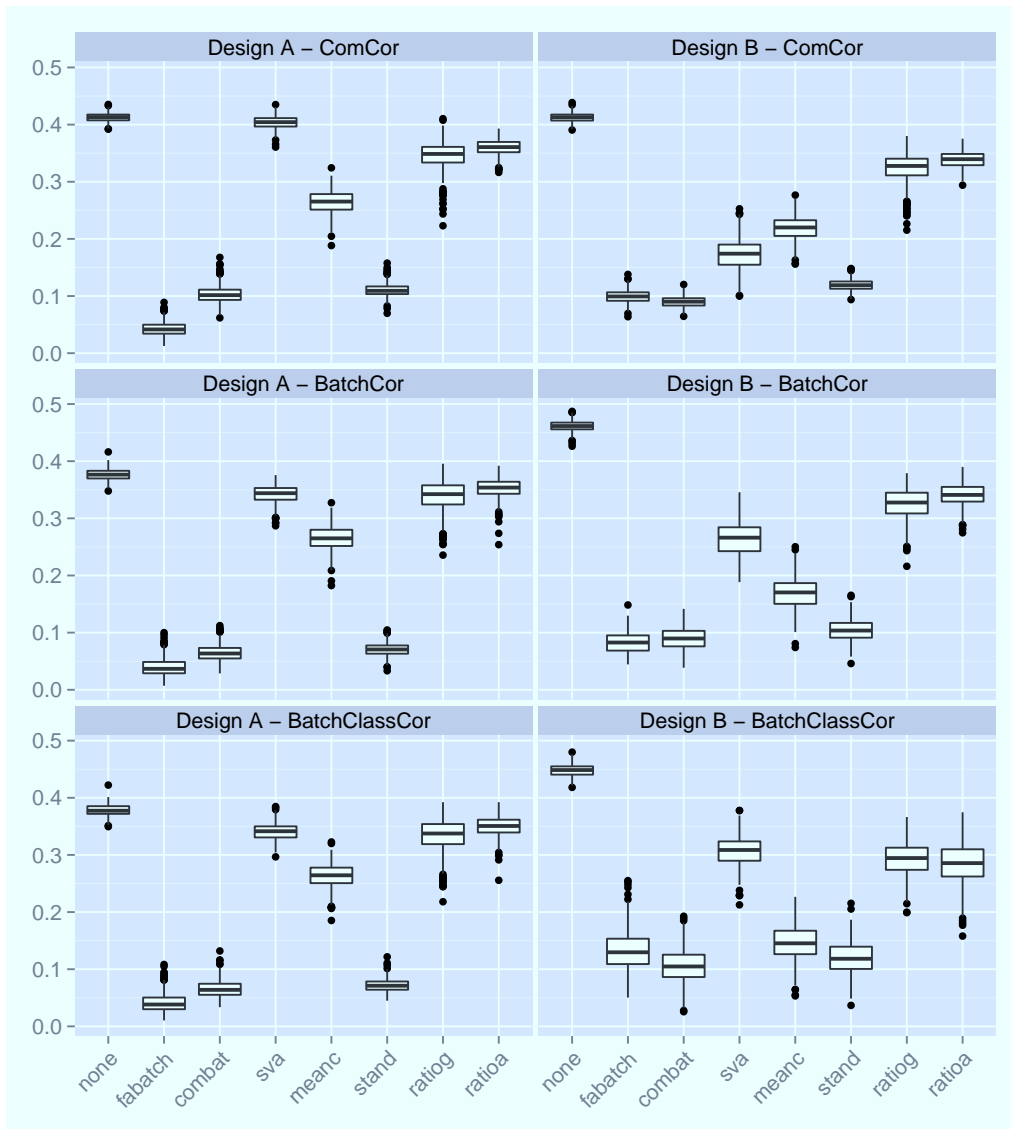

Fig. S8: Values of metric `sepscore` for all simulated datasets separated into simulation scenario and method.

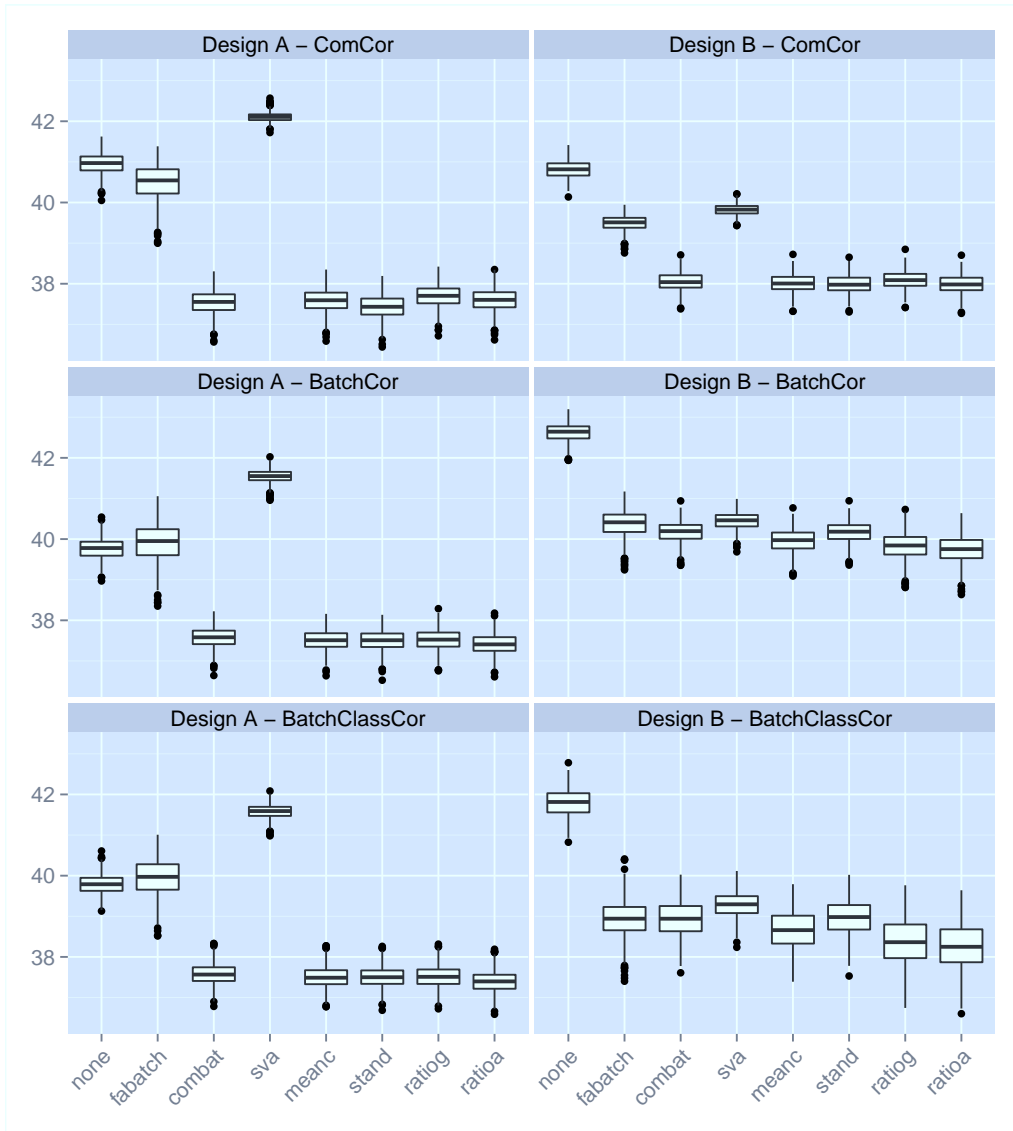

Fig. S9: Values of metric `avedist` for all simulated datasets separated into simulation scenario and method.



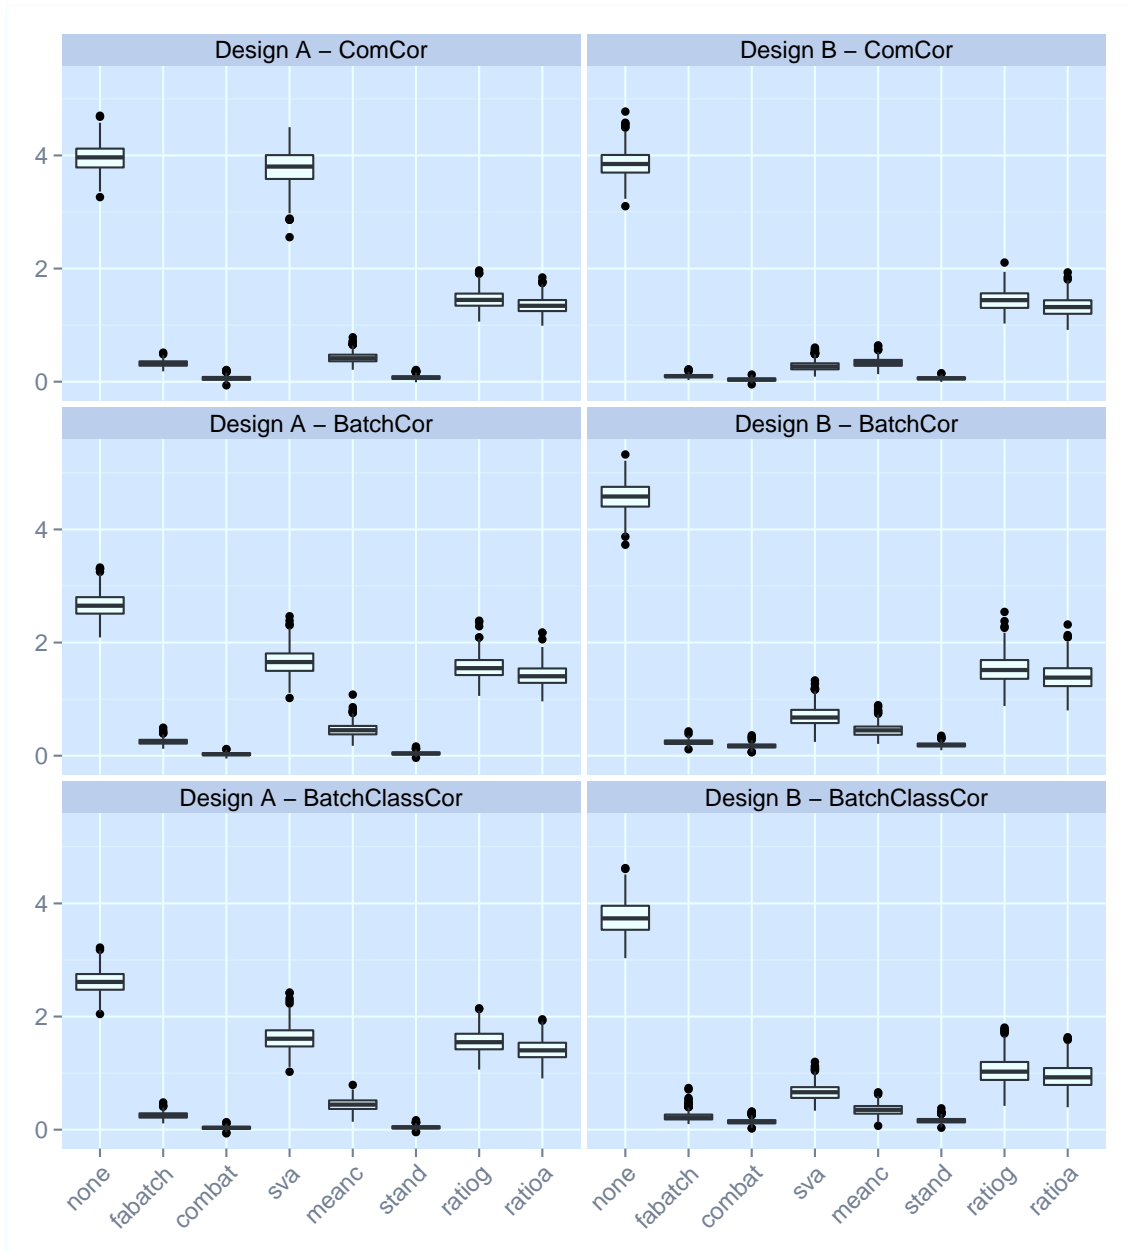

Fig. S10: Values of metric `klmtr` for all simulated datasets separated into simulation scenario and method.

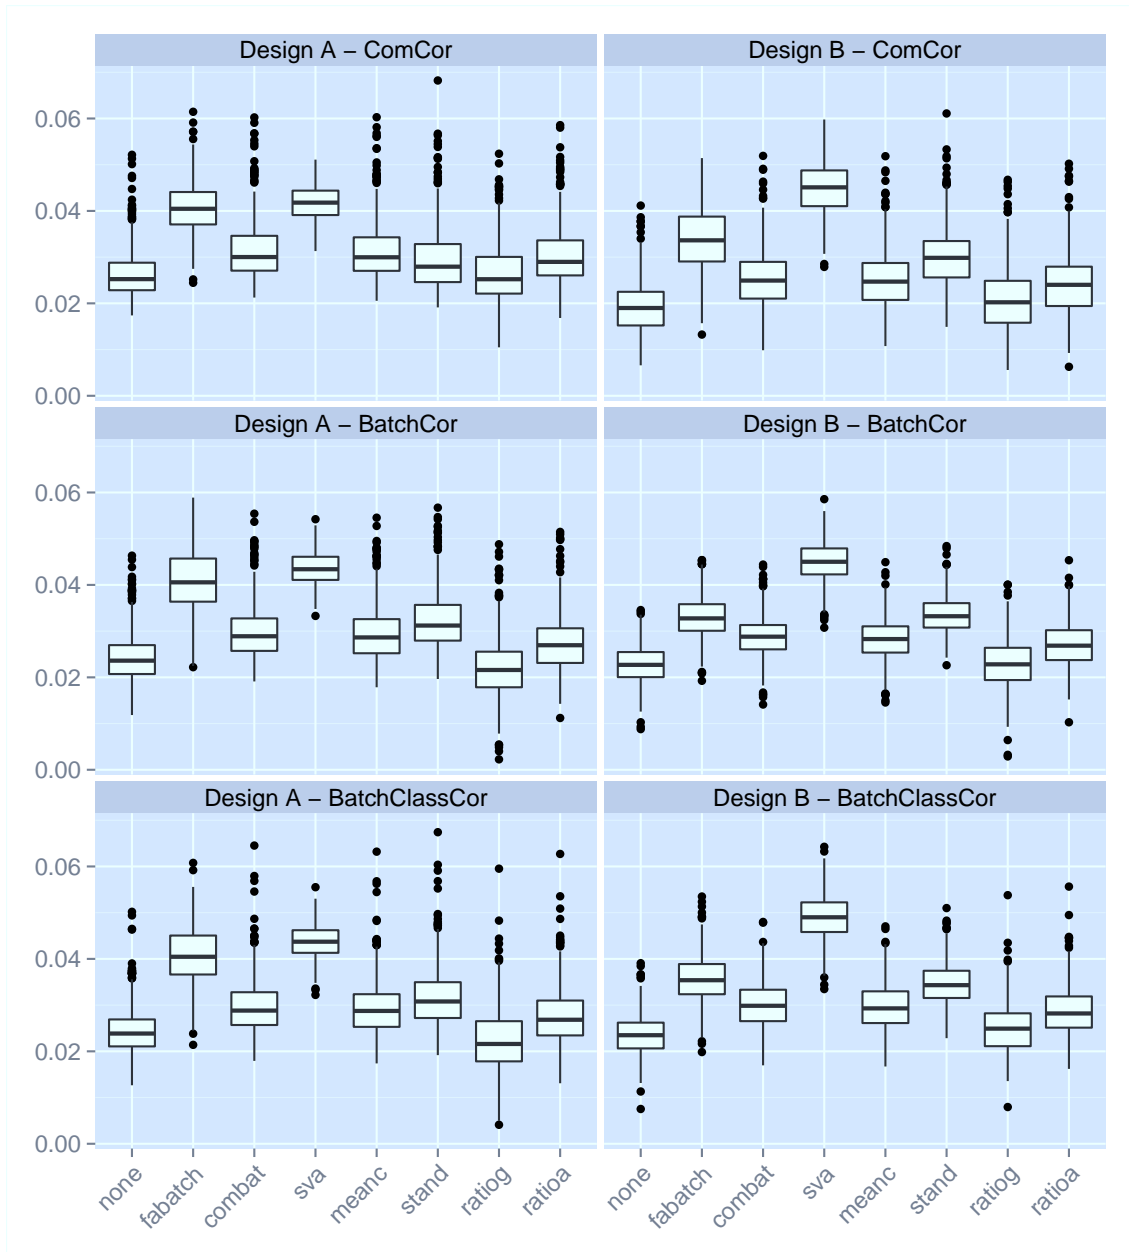

Fig. S11: Values of metric *pvca* for all simulated datasets separated into simulation scenario and method.

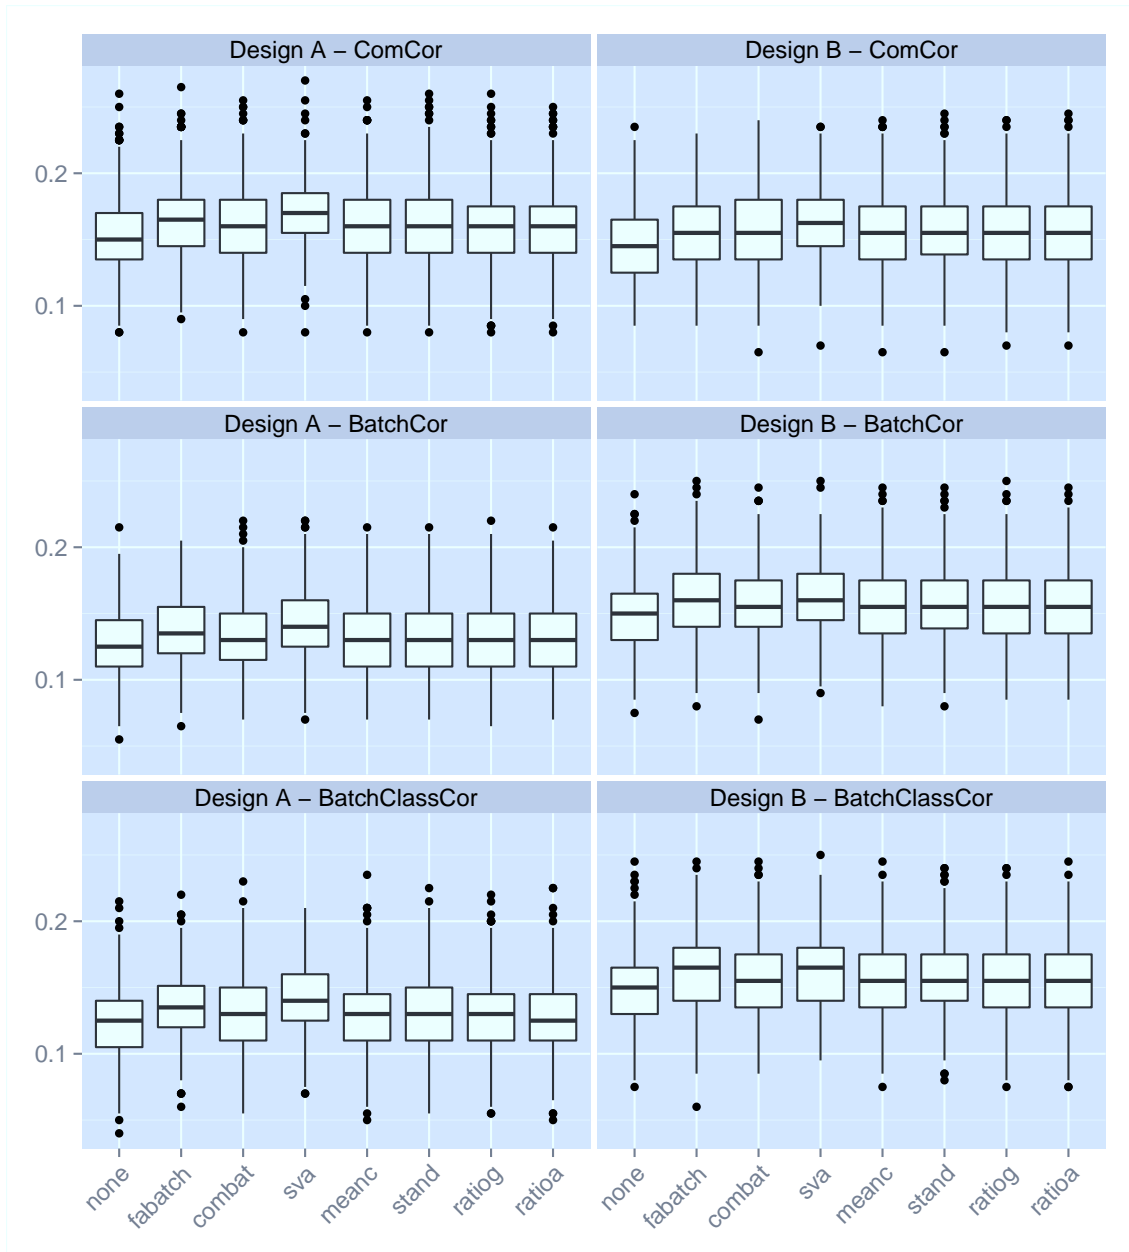

Fig. S12: Values of metric `diffexpr` for all simulated datasets separated into simulation scenario and method.

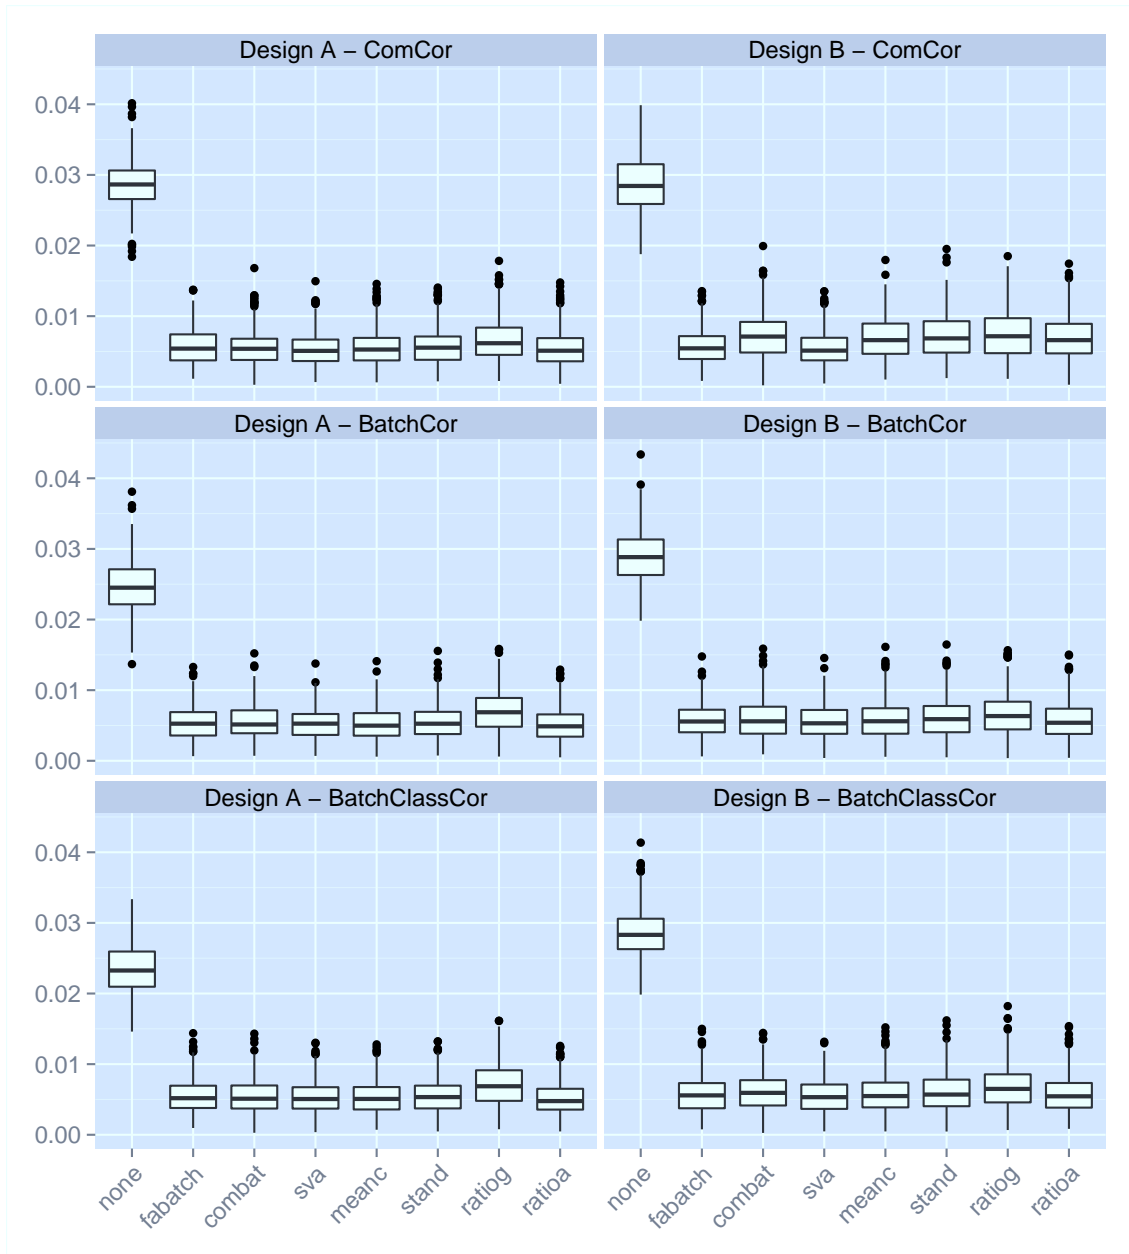

Fig. S13: Values of metric `skewdiv` for all simulated datasets separated into simulation scenario and method.

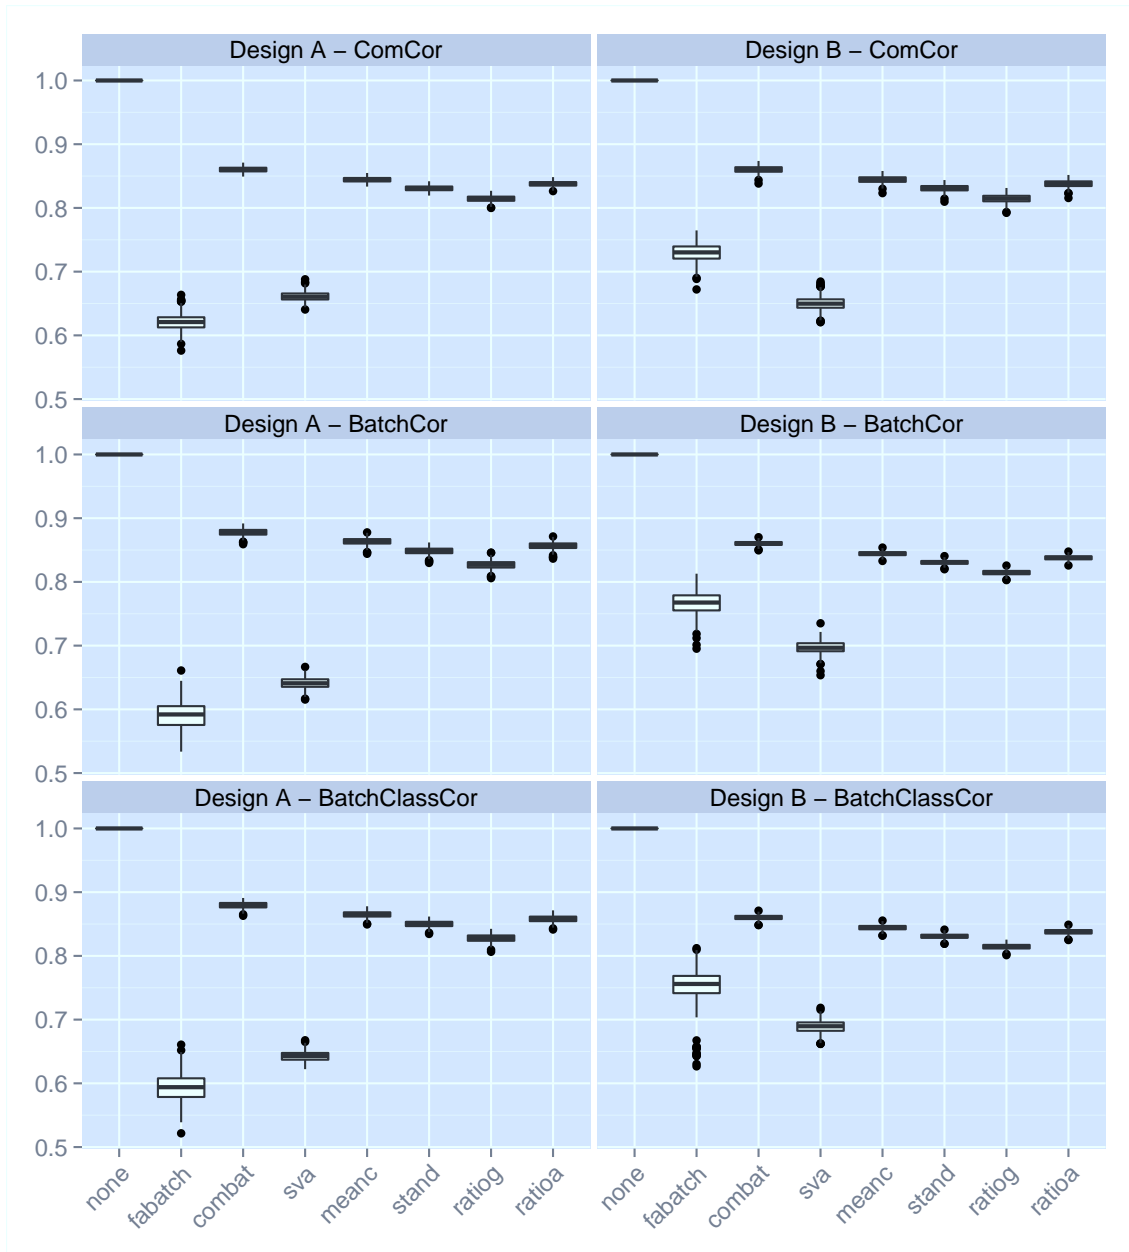

Fig. S14: Values of metric corbeaf for all simulated datasets separated into simulation scenario and method.

Table S1: Means of the values of metric **sepscore** and of their ranks among the different methods over all simulated datasets separated into simulation scenario and method. In each row the results are listed in descending order according to mean performance in terms of the original values and their ranks, respectively.

| Factor induced correlations - Common Correlations                      |                                  |                                  |                                  |                  |                    |                    |                   |                 |
|------------------------------------------------------------------------|----------------------------------|----------------------------------|----------------------------------|------------------|--------------------|--------------------|-------------------|-----------------|
| mean values                                                            | <b>fabatch</b><br><b>0.04259</b> | combat<br>0.10329                | stand<br>0.10983                 | meanc<br>0.26425 | ratioig<br>0.34545 | ratioa<br>0.36033  | sva<br>0.40368    | none<br>0.41272 |
| mean ranks                                                             | <b>fabatch</b><br><b>1</b>       | combat<br>2.272                  | stand<br>2.728                   | meanc<br>4.012   | ratioig<br>5.159   | ratioa<br>5.851    | sva<br>7.236      | none<br>7.742   |
| Factor induced correlations - Batch-specific Correlations              |                                  |                                  |                                  |                  |                    |                    |                   |                 |
| mean values                                                            | <b>fabatch</b><br><b>0.03983</b> | combat<br>0.06467                | stand<br>0.07055                 | meanc<br>0.2652  | ratioig<br>0.33873 | sva<br>0.34239     | ratioa<br>0.3529  | none<br>0.3767  |
| mean ranks                                                             | <b>fabatch</b><br><b>1.184</b>   | combat<br>2.168                  | stand<br>2.648                   | meanc<br>4.022   | ratioig<br>5.807   | sva<br>5.818       | ratioa<br>6.485   | none<br>7.868   |
| Factor induced correlations - Batch-class-specific Correlations        |                                  |                                  |                                  |                  |                    |                    |                   |                 |
| mean values                                                            | <b>fabatch</b><br><b>0.04157</b> | combat<br>0.06515                | stand<br>0.07127                 | meanc<br>0.263   | ratioig<br>0.33364 | sva<br>0.34064     | ratioa<br>0.34989 | none<br>0.37793 |
| mean ranks                                                             | <b>fabatch</b><br><b>1.21</b>    | combat<br>2.138                  | stand<br>2.652                   | meanc<br>4.024   | ratioig<br>5.698   | sva<br>5.841       | ratioa<br>6.515   | none<br>7.922   |
| Correlations estimated on real data - Common Correlations              |                                  |                                  |                                  |                  |                    |                    |                   |                 |
| mean values                                                            | combat<br>0.09024                | <b>fabatch</b><br><b>0.09931</b> | stand<br>0.11938                 | sva<br>0.17365   | meanc<br>0.21915   | ratioig<br>0.32436 | ratioa<br>0.33918 | none<br>0.41279 |
| mean ranks                                                             | combat<br>1.252                  | <b>fabatch</b><br><b>1.825</b>   | stand<br>2.939                   | sva<br>4.056     | meanc<br>4.928     | ratioig<br>6.215   | ratioa<br>6.785   | none<br>8       |
| Correlations estimated on real data - Batch-specific Correlations      |                                  |                                  |                                  |                  |                    |                    |                   |                 |
| mean values                                                            | <b>fabatch</b><br><b>0.08246</b> | combat<br>0.09017                | stand<br>0.10397                 | meanc<br>0.16851 | sva<br>0.26416     | ratioig<br>0.32547 | ratioa<br>0.34139 | none<br>0.46142 |
| mean ranks                                                             | <b>fabatch</b><br><b>1.522</b>   | combat<br>1.742                  | stand<br>2.806                   | meanc<br>3.932   | sva<br>5.068       | ratioig<br>6.098   | ratioa<br>6.832   | none<br>8       |
| Correlations estimated on real data - Batch-class-specific Correlation |                                  |                                  |                                  |                  |                    |                    |                   |                 |
| mean values                                                            | combat<br>0.10634                | stand<br>0.11988                 | <b>fabatch</b><br><b>0.13248</b> | meanc<br>0.146   | ratioa<br>0.28421  | ratioig<br>0.29216 | sva<br>0.30619    | none<br>0.44789 |
| mean ranks                                                             | combat<br>1.444                  | stand<br>2.616                   | <b>fabatch</b><br><b>2.809</b>   | meanc<br>3.139   | ratioa<br>5.574    | ratioig<br>6.072   | sva<br>6.346      | none<br>8       |

Table S2: Means of the values of metric **avedist** and of their ranks among the different methods over all simulated datasets separated into simulation scenario and method. In each row the results are listed in descending order according to mean performance in terms of the original values and their ranks, respectively.

| Factor induced correlations - Common Correlations                      |                    |                    |                   |                               |                                  |                                   |                                   |                  |
|------------------------------------------------------------------------|--------------------|--------------------|-------------------|-------------------------------|----------------------------------|-----------------------------------|-----------------------------------|------------------|
| mean values                                                            | stand<br>37.42382  | combat<br>37.53441 | meanc<br>37.58121 | ratioa<br>37.59354            | ratioi<br>37.69106               | <b>fabatch</b><br><b>40.49195</b> | none<br>40.95461                  | sva<br>42.10377  |
| mean ranks                                                             | stand<br>1.016     | combat<br>2.212    | meanc<br>3.354    | ratioa<br>3.446               | ratioi<br>4.972                  | <b>fabatch</b><br><b>6.198</b>    | none<br>6.802                     | sva<br>8         |
| Factor induced correlations - Batch-specific Correlations              |                    |                    |                   |                               |                                  |                                   |                                   |                  |
| mean values                                                            | ratioa<br>37.40834 | meanc<br>37.50749  | stand<br>37.50828 | ratioi<br>37.52306            | combat<br>37.57991               | none<br>39.7664                   | <b>fabatch</b><br><b>39.90564</b> | sva<br>41.54491  |
| mean ranks                                                             | ratioa<br>1.228    | stand<br>2.768     | meanc<br>2.934    | ratioi<br>3.448               | combat<br>4.622                  | none<br>6.354                     | <b>fabatch</b><br><b>6.646</b>    | sva<br>8         |
| Factor induced correlations - Batch-class-specific Correlations        |                    |                    |                   |                               |                                  |                                   |                                   |                  |
| mean values                                                            | ratioa<br>37.39577 | meanc<br>37.49533  | stand<br>37.49946 | ratioi<br>37.512              | combat<br>37.57149               | none<br>39.78901                  | <b>fabatch</b><br><b>39.93852</b> | sva<br>41.58123  |
| mean ranks                                                             | ratioa<br>1.228    | stand<br>2.752     | meanc<br>2.878    | ratioi<br>3.498               | combat<br>4.644                  | none<br>6.358                     | <b>fabatch</b><br><b>6.642</b>    | sva<br>8         |
| Correlations estimated on real data - Common Correlations              |                    |                    |                   |                               |                                  |                                   |                                   |                  |
| mean values                                                            | stand<br>37.98839  | ratioa<br>37.98975 | meanc<br>38.01252 | combat<br>38.05134            | ratioi<br>38.09271               | <b>fabatch</b><br><b>39.49123</b> | sva<br>39.82755                   | none<br>40.81266 |
| mean ranks                                                             | stand<br>1.764     | ratioa<br>2.064    | meanc<br>2.598    | combat<br>3.982               | ratioi<br>4.592                  | <b>fabatch</b><br><b>6.044</b>    | sva<br>6.956                      | none<br>8        |
| Correlations estimated on real data - Batch-specific Correlations      |                    |                    |                   |                               |                                  |                                   |                                   |                  |
| mean values                                                            | ratioa<br>39.74457 | ratioi<br>39.82068 | meanc<br>39.95839 | stand<br>40.1671              | combat<br>40.1761                | <b>fabatch</b><br><b>40.38741</b> | sva<br>40.44444                   | none<br>42.62075 |
| mean ranks                                                             | ratioa<br>1.13     | ratioi<br>2.152    | meanc<br>3.112    | stand<br>4.82                 | combat<br>5.024                  | <b>fabatch</b><br><b>5.736</b>    | sva<br>6.026                      | none<br>8        |
| Correlations estimated on real data - Batch-class-specific Correlation |                    |                    |                   |                               |                                  |                                   |                                   |                  |
| mean values                                                            | ratioa<br>38.26292 | ratioi<br>38.3701  | meanc<br>38.66762 | combat<br>38.93779            | <b>fabatch</b><br><b>38.9477</b> | stand<br>38.97117                 | sva<br>39.28459                   | none<br>41.79299 |
| mean ranks                                                             | ratioa<br>1.174    | ratioi<br>2.218    | meanc<br>3.354    | <b>fabatch</b><br><b>4.69</b> | combat<br>4.946                  | stand<br>5.468                    | sva<br>6.15                       | none<br>8        |

Table S3: Means of the values of metric `klmetr` and of their ranks among the different methods over all simulated datasets separated into simulation scenario and method. In each row the results are listed in descending order according to mean performance in terms of the original values and their ranks, respectively.

| Factor induced correlations - Common Correlations                      |         |         |                |         |         |         |         |         |
|------------------------------------------------------------------------|---------|---------|----------------|---------|---------|---------|---------|---------|
| mean values                                                            | combat  | stand   | <b>fabatch</b> | meanc   | ratioa  | ratiog  | sva     | none    |
|                                                                        | 0.06141 | 0.07561 | <b>0.32144</b> | 0.4242  | 1.34917 | 1.44874 | 3.78636 | 3.96088 |
| mean ranks                                                             | combat  | stand   | <b>fabatch</b> | meanc   | ratioa  | ratiog  | sva     | none    |
|                                                                        | 1.344   | 1.656   | <b>3.164</b>   | 3.836   | 5.002   | 5.998   | 7.342   | 7.658   |
| Factor induced correlations - Batch-specific Correlations              |         |         |                |         |         |         |         |         |
| mean values                                                            | combat  | stand   | <b>fabatch</b> | meanc   | ratioa  | ratiog  | sva     | none    |
|                                                                        | 0.02796 | 0.03953 | <b>0.25008</b> | 0.45892 | 1.41785 | 1.56052 | 1.66582 | 2.65573 |
| mean ranks                                                             | combat  | stand   | <b>fabatch</b> | meanc   | ratioa  | ratiog  | sva     | none    |
|                                                                        | 1.344   | 1.656   | <b>3.036</b>   | 3.964   | 5.198   | 6.376   | 6.426   | 8       |
| Factor induced correlations - Batch-class-specific Correlations        |         |         |                |         |         |         |         |         |
| mean values                                                            | combat  | stand   | <b>fabatch</b> | meanc   | ratioa  | ratiog  | sva     | none    |
|                                                                        | 0.03325 | 0.04196 | <b>0.25189</b> | 0.44475 | 1.41077 | 1.55757 | 1.61859 | 2.61917 |
| mean ranks                                                             | combat  | stand   | <b>fabatch</b> | meanc   | ratioa  | sva     | ratiog  | none    |
|                                                                        | 1.394   | 1.606   | <b>3.05</b>    | 3.95    | 5.2     | 6.382   | 6.418   | 8       |
| Correlations estimated on real data - Common Correlations              |         |         |                |         |         |         |         |         |
| mean values                                                            | combat  | stand   | <b>fabatch</b> | sva     | meanc   | ratioa  | ratiog  | none    |
|                                                                        | 0.03725 | 0.06081 | <b>0.09927</b> | 0.27584 | 0.33733 | 1.32624 | 1.44356 | 3.86244 |
| mean ranks                                                             | combat  | stand   | <b>fabatch</b> | sva     | meanc   | ratioa  | ratiog  | none    |
|                                                                        | 1.278   | 1.938   | <b>2.794</b>   | 4.286   | 4.704   | 6       | 7       | 8       |
| Correlations estimated on real data - Batch-specific Correlations      |         |         |                |         |         |         |         |         |
| mean values                                                            | combat  | stand   | <b>fabatch</b> | meanc   | sva     | ratioa  | ratiog  | none    |
|                                                                        | 0.17189 | 0.19011 | <b>0.23987</b> | 0.44967 | 0.69586 | 1.40077 | 1.53715 | 4.57746 |
| mean ranks                                                             | combat  | stand   | <b>fabatch</b> | meanc   | sva     | ratioa  | ratiog  | none    |
|                                                                        | 1.382   | 1.888   | <b>2.748</b>   | 4.066   | 4.922   | 5.994   | 7       | 8       |
| Correlations estimated on real data - Batch-class-specific Correlation |         |         |                |         |         |         |         |         |
| mean values                                                            | combat  | stand   | <b>fabatch</b> | meanc   | sva     | ratioa  | ratiog  | none    |
|                                                                        | 0.14284 | 0.16164 | <b>0.23314</b> | 0.35449 | 0.66427 | 0.94171 | 1.0381  | 3.75182 |
| mean ranks                                                             | combat  | stand   | <b>fabatch</b> | meanc   | sva     | ratioa  | ratiog  | none    |
|                                                                        | 1.372   | 1.874   | <b>2.894</b>   | 3.882   | 5.218   | 5.856   | 6.904   | 8       |



Table S4: Means of the values of metric `pvca` and of their ranks among the different methods over all simulated datasets separated into simulation scenario and method. In each row the results are listed in descending order according to mean performance in terms of the original values and their ranks, respectively.

| Factor induced correlations - Common Correlations                      |         |                |                |         |         |         |         |         |
|------------------------------------------------------------------------|---------|----------------|----------------|---------|---------|---------|---------|---------|
| mean values                                                            | sva     | <b>fabatch</b> | combat         | meanc   | ratioa  | stand   | none    | ratioi  |
|                                                                        | 0.04174 | <b>0.04079</b> | 0.03155        | 0.03139 | 0.03047 | 0.02972 | 0.02643 | 0.02634 |
| mean ranks                                                             | sva     | <b>fabatch</b> | combat         | meanc   | ratioa  | stand   | ratioi  | none    |
|                                                                        | 1.69    | <b>1.88</b>    | 3.874          | 4.086   | 4.752   | 5.386   | 7.044   | 7.288   |
| Factor induced correlations - Batch-specific Correlations              |         |                |                |         |         |         |         |         |
| mean values                                                            | sva     | <b>fabatch</b> | stand          | combat  | meanc   | ratioa  | none    | ratioi  |
|                                                                        | 0.04362 | <b>0.04099</b> | 0.03228        | 0.02981 | 0.02956 | 0.02743 | 0.02432 | 0.02209 |
| mean ranks                                                             | sva     | <b>fabatch</b> | stand          | combat  | meanc   | ratioa  | none    | ratioi  |
|                                                                        | 1.482   | <b>1.868</b>   | 3.212          | 4.372   | 4.696   | 5.626   | 7.122   | 7.622   |
| Factor induced correlations - Batch-class-specific Correlations        |         |                |                |         |         |         |         |         |
| mean values                                                            | sva     | <b>fabatch</b> | stand          | combat  | meanc   | ratioa  | none    | ratioi  |
|                                                                        | 0.04376 | <b>0.04053</b> | 0.03172        | 0.02988 | 0.02964 | 0.02771 | 0.02459 | 0.02254 |
| mean ranks                                                             | sva     | <b>fabatch</b> | stand          | combat  | meanc   | ratioa  | none    | ratioi  |
|                                                                        | 1.37    | <b>1.986</b>   | 3.436          | 4.362   | 4.604   | 5.568   | 7.154   | 7.52    |
| Correlations estimated on real data - Common Correlations              |         |                |                |         |         |         |         |         |
| mean values                                                            | sva     | <b>fabatch</b> | stand          | combat  | meanc   | ratioa  | ratioi  | none    |
|                                                                        | 0.04484 | <b>0.03385</b> | 0.0301         | 0.02528 | 0.02505 | 0.0242  | 0.02065 | 0.01921 |
| mean ranks                                                             | sva     | <b>fabatch</b> | stand          | combat  | meanc   | ratioa  | ratioi  | none    |
|                                                                        | 1.032   | <b>2.394</b>   | 2.932          | 4.804   | 5.032   | 5.276   | 6.96    | 7.57    |
| Correlations estimated on real data - Batch-specific Correlations      |         |                |                |         |         |         |         |         |
| mean values                                                            | sva     | stand          | <b>fabatch</b> | combat  | meanc   | ratioa  | ratioi  | none    |
|                                                                        | 0.04494 | 0.03349        | <b>0.03294</b> | 0.02878 | 0.02822 | 0.02702 | 0.0229  | 0.02276 |
| mean ranks                                                             | sva     | stand          | <b>fabatch</b> | combat  | meanc   | ratioa  | ratioi  | none    |
|                                                                        | 1.008   | 2.54           | <b>2.888</b>   | 4.474   | 4.96    | 5.41    | 7.248   | 7.472   |
| Correlations estimated on real data - Batch-class-specific Correlation |         |                |                |         |         |         |         |         |
| mean values                                                            | sva     | <b>fabatch</b> | stand          | combat  | meanc   | ratioa  | ratioi  | none    |
|                                                                        | 0.04893 | <b>0.03542</b> | 0.03463        | 0.0301  | 0.02965 | 0.02862 | 0.02497 | 0.02351 |
| mean ranks                                                             | sva     | stand          | <b>fabatch</b> | combat  | meanc   | ratioa  | ratioi  | none    |
|                                                                        | 1.008   | 2.662          | <b>2.76</b>    | 4.602   | 5.002   | 5.33    | 7.042   | 7.594   |

Table S5: Means of the values of metric `diffexpr` and of their ranks among the different methods over all simulated datasets separated into simulation scenario and method. In each row the results are listed in descending order according to mean performance in terms of the original values and their ranks, respectively.

| Factor induced correlations - Common Correlations                      |                |                |         |         |                |         |         |         |
|------------------------------------------------------------------------|----------------|----------------|---------|---------|----------------|---------|---------|---------|
| mean values                                                            | sva            | <b>fabatch</b> | combat  | stand   | meanc          | ratioa  | ratioig | none    |
|                                                                        | 0.16971        | <b>0.16407</b> | 0.16098 | 0.16097 | 0.1603         | 0.15957 | 0.15924 | 0.15215 |
| mean ranks                                                             | sva            | <b>fabatch</b> | combat  | stand   | meanc          | ratioa  | ratioig | none    |
|                                                                        | 3.192          | <b>3.926</b>   | 4.273   | 4.361   | 4.558          | 4.753   | 4.844   | 6.093   |
| Factor induced correlations - Batch-specific Correlations              |                |                |         |         |                |         |         |         |
| mean values                                                            | sva            | <b>fabatch</b> | combat  | stand   | meanc          | ratioa  | ratioig | none    |
|                                                                        | 0.14241        | <b>0.13769</b> | 0.13267 | 0.13246 | 0.13195        | 0.13094 | 0.13074 | 0.12615 |
| mean ranks                                                             | sva            | <b>fabatch</b> | combat  | stand   | meanc          | ratioa  | ratioig | none    |
|                                                                        | 3.202          | <b>3.821</b>   | 4.442   | 4.448   | 4.548          | 4.849   | 4.898   | 5.792   |
| Factor induced correlations - Batch-class-specific Correlations        |                |                |         |         |                |         |         |         |
| mean values                                                            | sva            | <b>fabatch</b> | stand   | combat  | meanc          | ratioig | ratioa  | none    |
|                                                                        | 0.1414         | <b>0.13553</b> | 0.12975 | 0.12949 | 0.12902        | 0.12798 | 0.12777 | 0.12367 |
| mean ranks                                                             | sva            | <b>fabatch</b> | stand   | combat  | meanc          | ratioig | ratioa  | none    |
|                                                                        | 2.936          | <b>3.801</b>   | 4.477   | 4.508   | 4.618          | 4.909   | 5.015   | 5.736   |
| Correlations estimated on real data - Common Correlations              |                |                |         |         |                |         |         |         |
| mean values                                                            | sva            | stand          | combat  | meanc   | <b>fabatch</b> | ratioa  | ratioig | none    |
|                                                                        | 0.16337        | 0.15697        | 0.1568  | 0.15587 | <b>0.15579</b> | 0.15554 | 0.1552  | 0.14817 |
| mean ranks                                                             | sva            | stand          | combat  | meanc   | <b>fabatch</b> | ratioa  | ratioig | none    |
|                                                                        | 3.62           | 4.134          | 4.163   | 4.433   | <b>4.56</b>    | 4.572   | 4.64    | 5.878   |
| Correlations estimated on real data - Batch-specific Correlations      |                |                |         |         |                |         |         |         |
| mean values                                                            | sva            | <b>fabatch</b> | combat  | stand   | meanc          | ratioig | ratioa  | none    |
|                                                                        | 0.16086        | <b>0.16064</b> | 0.15724 | 0.15721 | 0.15659        | 0.15598 | 0.15595 | 0.14802 |
| mean ranks                                                             | <b>fabatch</b> | sva            | combat  | stand   | meanc          | ratioig | ratioa  | none    |
|                                                                        | <b>3.772</b>   | 3.791          | 4.236   | 4.299   | 4.448          | 4.628   | 4.635   | 6.191   |
| Correlations estimated on real data - Batch-class-specific Correlation |                |                |         |         |                |         |         |         |
| mean values                                                            | sva            | <b>fabatch</b> | stand   | combat  | meanc          | ratioa  | ratioig | none    |
|                                                                        | 0.16286        | <b>0.16221</b> | 0.158   | 0.15792 | 0.15711        | 0.15637 | 0.15621 | 0.14918 |
| mean ranks                                                             | sva            | <b>fabatch</b> | stand   | combat  | meanc          | ratioa  | ratioig | none    |
|                                                                        | 3.58           | <b>3.689</b>   | 4.235   | 4.314   | 4.528          | 4.755   | 4.803   | 6.096   |

Table S6: Means of the values of metric `skewdiv` and of their ranks among the different methods over all simulated datasets separated into simulation scenario and method. In each row the results are listed in descending order according to mean performance in terms of the original values and their ranks, respectively.

| Factor induced correlations - Common Correlations                      |         |                |                |                |                |         |         |         |
|------------------------------------------------------------------------|---------|----------------|----------------|----------------|----------------|---------|---------|---------|
| mean values                                                            | sva     | ratioa         | meanc          | combat         | <b>fabatch</b> | stand   | ratioig | none    |
|                                                                        | 0.00535 | 0.0054         | 0.00547        | 0.0055         | <b>0.00571</b> | 0.00573 | 0.00651 | 0.02865 |
| mean ranks                                                             | ratioa  | meanc          | sva            | combat         | <b>fabatch</b> | stand   | ratioig | none    |
|                                                                        | 3.514   | 3.696          | 3.832          | 3.852          | <b>4.124</b>   | 4.252   | 4.73    | 8       |
| Factor induced correlations - Batch-specific Correlations              |         |                |                |                |                |         |         |         |
| mean values                                                            | ratioa  | meanc          | sva            | stand          | <b>fabatch</b> | combat  | ratioig | none    |
|                                                                        | 0.00509 | 0.00519        | 0.00524        | 0.00543        | <b>0.00544</b> | 0.00556 | 0.00701 | 0.0246  |
| mean ranks                                                             | ratioa  | meanc          | sva            | <b>fabatch</b> | stand          | combat  | ratioig | none    |
|                                                                        | 3.402   | 3.612          | 3.722          | <b>3.97</b>    | 4              | 4.08    | 5.214   | 8       |
| Factor induced correlations - Batch-class-specific Correlations        |         |                |                |                |                |         |         |         |
| mean values                                                            | ratioa  | meanc          | sva            | combat         | <b>fabatch</b> | stand   | ratioig | none    |
|                                                                        | 0.00515 | 0.00527        | 0.00528        | 0.00544        | <b>0.00548</b> | 0.0055  | 0.00712 | 0.02349 |
| mean ranks                                                             | ratioa  | meanc          | sva            | <b>fabatch</b> | combat         | stand   | ratioig | none    |
|                                                                        | 3.486   | 3.724          | 3.796          | <b>3.872</b>   | 3.89           | 4.022   | 5.21    | 8       |
| Correlations estimated on real data - Common Correlations              |         |                |                |                |                |         |         |         |
| mean values                                                            | sva     | <b>fabatch</b> | meanc          | ratioa         | stand          | combat  | ratioig | none    |
|                                                                        | 0.00545 | <b>0.00571</b> | 0.00692        | 0.00695        | 0.00716        | 0.00722 | 0.00751 | 0.02868 |
| mean ranks                                                             | sva     | <b>fabatch</b> | meanc          | ratioa         | combat         | stand   | ratioig | none    |
|                                                                        | 3.072   | <b>3.266</b>   | 4.062          | 4.094          | 4.426          | 4.432   | 4.648   | 8       |
| Correlations estimated on real data - Batch-specific Correlations      |         |                |                |                |                |         |         |         |
| mean values                                                            | sva     | ratioa         | <b>fabatch</b> | meanc          | combat         | stand   | ratioig | none    |
|                                                                        | 0.00552 | 0.00572        | <b>0.00574</b> | 0.00584        | 0.00591        | 0.00608 | 0.00659 | 0.02892 |
| mean ranks                                                             | ratioa  | sva            | meanc          | <b>fabatch</b> | combat         | stand   | ratioig | none    |
|                                                                        | 3.592   | 3.762          | 3.832          | <b>3.848</b>   | 3.956          | 4.47    | 4.54    | 8       |
| Correlations estimated on real data - Batch-class-specific Correlation |         |                |                |                |                |         |         |         |
| mean values                                                            | sva     | <b>fabatch</b> | ratioa         | meanc          | stand          | combat  | ratioig | none    |
|                                                                        | 0.00547 | <b>0.00573</b> | 0.00573        | 0.00581        | 0.00601        | 0.00602 | 0.00674 | 0.0285  |
| mean ranks                                                             | ratioa  | sva            | meanc          | <b>fabatch</b> | combat         | stand   | ratioig | none    |
|                                                                        | 3.566   | 3.626          | 3.876          | <b>3.95</b>    | 4.074          | 4.222   | 4.686   | 8       |

Table S7: Means of the values of metric **corbeaf** and of their ranks among the different methods over all simulated datasets separated into simulation scenario and method. In each row the results are listed in descending order according to mean performance in terms of the original values and their ranks, respectively.

| Factor induced correlations - Common Correlations                      |           |                   |                  |                   |                  |                   |                                  |                                  |
|------------------------------------------------------------------------|-----------|-------------------|------------------|-------------------|------------------|-------------------|----------------------------------|----------------------------------|
| mean values                                                            | none<br>1 | combat<br>0.86018 | meanc<br>0.84427 | ratioa<br>0.83774 | stand<br>0.83067 | ratiog<br>0.81446 | sva<br>0.66124                   | <b>fabatch</b><br><b>0.62064</b> |
| mean ranks                                                             | none<br>1 | combat<br>2       | meanc<br>3       | ratioa<br>4       | stand<br>5       | ratiog<br>6       | sva<br>7                         | <b>fabatch</b><br><b>8</b>       |
| Factor induced correlations - Batch-specific Correlations              |           |                   |                  |                   |                  |                   |                                  |                                  |
| mean values                                                            | none<br>1 | combat<br>0.87781 | meanc<br>0.86351 | ratioa<br>0.85656 | stand<br>0.84845 | ratiog<br>0.82682 | sva<br>0.64111                   | <b>fabatch</b><br><b>0.59071</b> |
| mean ranks                                                             | none<br>1 | combat<br>2       | meanc<br>3       | ratioa<br>4       | stand<br>5       | ratiog<br>6       | sva<br>7.006                     | <b>fabatch</b><br><b>7.994</b>   |
| Factor induced correlations - Batch-class-specific Correlations        |           |                   |                  |                   |                  |                   |                                  |                                  |
| mean values                                                            | none<br>1 | combat<br>0.87943 | meanc<br>0.8651  | ratioa<br>0.85816 | stand<br>0.85006 | ratiog<br>0.828   | sva<br>0.64263                   | <b>fabatch</b><br><b>0.59331</b> |
| mean ranks                                                             | none<br>1 | combat<br>2       | meanc<br>3       | ratioa<br>4       | stand<br>5       | ratiog<br>6       | sva<br>7.006                     | <b>fabatch</b><br><b>7.994</b>   |
| Correlations estimated on real data - Common Correlations              |           |                   |                  |                   |                  |                   |                                  |                                  |
| mean values                                                            | none<br>1 | combat<br>0.86037 | meanc<br>0.84442 | ratioa<br>0.8379  | stand<br>0.83086 | ratiog<br>0.81468 | <b>fabatch</b><br><b>0.72987</b> | sva<br>0.64994                   |
| mean ranks                                                             | none<br>1 | combat<br>2       | meanc<br>3       | ratioa<br>4       | stand<br>5       | ratiog<br>6       | <b>fabatch</b><br><b>7</b>       | sva<br>8                         |
| Correlations estimated on real data - Batch-specific Correlations      |           |                   |                  |                   |                  |                   |                                  |                                  |
| mean values                                                            | none<br>1 | combat<br>0.86035 | meanc<br>0.84433 | ratioa<br>0.83781 | stand<br>0.83078 | ratiog<br>0.81458 | <b>fabatch</b><br><b>0.76653</b> | sva<br>0.69691                   |
| mean ranks                                                             | none<br>1 | combat<br>2       | meanc<br>3       | ratioa<br>4       | stand<br>5       | ratiog<br>6       | <b>fabatch</b><br><b>7.002</b>   | sva<br>7.998                     |
| Correlations estimated on real data - Batch-class-specific Correlation |           |                   |                  |                   |                  |                   |                                  |                                  |
| mean values                                                            | none<br>1 | combat<br>0.86023 | meanc<br>0.84423 | ratioa<br>0.83771 | stand<br>0.83071 | ratiog<br>0.81446 | <b>fabatch</b><br><b>0.75314</b> | sva<br>0.68924                   |
| mean ranks                                                             | none<br>1 | combat<br>2       | meanc<br>3       | ratioa<br>4       | stand<br>5       | ratiog<br>6.002   | <b>fabatch</b><br><b>7.024</b>   | sva<br>7.974                     |

- [1] Johnson WE, Rabinovic A, Li C. Adjusting batch effects in microarray expression data using Empirical Bayes methods. *Biostatistics*. 2007;8:118–127.
- [2] Parker HS, Bravo HC, Leek JT. Removing batch effects for prediction problems with frozen surrogate variable analysis. *PeerJ*. 2014;2:e561.
- [3] Leek JT, Storey JD. Capturing heterogeneity in gene expression studies by surrogate variable analysis. *PLoS Genetics*. 2007;3:1724–1735.
- [4] Luo J, Schumacher M, Scherer A, Sanoudou D, Megherbi D, Davison T, et al. A comparison of batch effect removal methods for enhancement of prediction performance using MAQC-II microarray gene expression data. *The Pharmacogenomics Journal*. 2010;10:278–291.
- [5] Moen EL, Zhang X, Mu W, Delaney SM, Wing C, McQuade J, et al. Genome-Wide Variation of Cytosine Modifications Between European and African Populations and the Implications for Complex Traits. *Genetics*. 2013;194:987–996.
- [6] Godfrey AC, Xu Z, Weinberg CR, Getts RC, Wade PA, DeRoo LA, et al. Serum microRNA expression as an early marker for breast cancer risk in prospectively collected samples from the Sister Study cohort. *Breast Cancer Research*. 2013;15:R42.
